# Supplementary material for: Adaptive RAxML-NG: Accelerating Phylogenetic Inference under Maximum Likelihood using Dataset Difficulty
Source: PubMed Central journal article supplement — Mol Biol Evol. 2023 Oct 6;40(10):msad227. doi: 10.1093/molbev/msad227 (PMC10584362; doi:10.1093/molbev/msad227), 2023-10-06
Supplement: msad227_supplementary_data.pdf [file msad227_supplementary_data.pdf]

# Supplement to “Adaptive RAxML-NG: Accelerating Phylogenetic Inference under Maximum Likelihood using dataset difficulty”

Anastasis Togkousidis <sup>\*,1</sup>, Alexey M. Kozlov <sup>1</sup>, Julia Haag <sup>1</sup>, Dimitri Höhler <sup>1</sup>, Alexandros Stamatakis <sup>3,1,2</sup>

<sup>1</sup>Computational Molecular Evolution Group, Heidelberg Institute for Theoretical Studies, Germany

<sup>2</sup>Institute of Theoretical Informatics, Karlsruhe Institute of Technology, Karlsruhe, Germany

<sup>3</sup>Biodiversity Computing Group, Institute of Computer Science, Foundation for Research and Technology - Hellas

\*Corresponding author: E-mail: Anastasis.Togkousidis@h-its.org

## 1. Heuristic approach

The pseudocode of our adaptive RAxML-NG heuristic approach is summarized in Algorithm 1. The functions are the following by order of appearance:

- `GETRANDSTARTINGTREES()`: Function that takes as input the difficulty score of the MSA to be analyzed and returns the number of random starting trees to be used by adaptive RAxML-NG, based on Figure 2a available in the main text.
- `GETPARSSTARTINGTREES()`: Function that takes as input the difficulty score of the MSA to be analyzed and returns the number of MP starting trees to be used by adaptive RAxML-NG (see Figure 2a, main text).
- `OPTIMIZE()`: Core function of the algorithm, which takes as input a random/MP starting tree, the difficulty score of the corresponding MSA, and a numerical parameter  $\epsilon$ . This function conducts a full ML tree search

based on the adaptive heuristic described in Section 3 of the main text and returns the ML tree and its log-likelihood score. The numerical parameter  $\epsilon$  is used as a log-likelihood improvement threshold, that is, the tree search is terminated when the attained log-likelihood improvement does not exceed this  $\epsilon$  value. This default numerical convergence parameter is taken directly from RAxML-NG (Kozlov *et al.*, 2019) and was also used in standard RAxML (Stamatakis, 2014). The default parameter value in RAxML-NG v1.1 and standard RAxML is 0.1, while in the adaptive version and in v1.2 is 10. This modification on the default parameter value is based on the results of a recent comparative study (Haag *et al.*, 2022a), where the authors investigate the effect of different  $\epsilon$  value settings on the ML tree inference accuracy. Users can set the  $\epsilon$  value via the command line.

- `BLO()`: Branch-length optimization routine, that takes as input a binary tree and optimizes its branches.

---

**Algorithm 1** Adaptive RAxML-NG heuristic

---

```

Input: MSA, difficulty,  $\epsilon$ 
Output: MLtree, MLnL
MLnL  $\leftarrow -\infty$ , MLtree  $\leftarrow$  NONE // Initialization

// Initialize random/MP trees and execute the heuristic
randTrees  $\leftarrow$  GETRANDSTARTINGTREES(difficulty)
parsTrees  $\leftarrow$  GETPARSSTARTINGTREES(difficulty)
for randTree in randTrees do // Execute for each random tree
  ( tmpMLtree, LnL )  $\leftarrow$  OPTIMIZE(randTree, difficulty,  $\epsilon$ )
  if LnL > MLnL then
    MLnL  $\leftarrow$  LnL, MLtree  $\leftarrow$  tmpMLtree
  end if
end for

for parsTree in parsTrees do // Execute for each MP tree
  ( tmpMLtree, LnL )  $\leftarrow$  OPTIMIZE(parsTree, difficulty,  $\epsilon$ )
  if LnL > MLnL then
    MLnL  $\leftarrow$  LnL, MLtree  $\leftarrow$  tmpMLtree
  end if
end for

function OPTIMIZE(tree, difficulty,  $\epsilon$ )
  LnL  $\leftarrow -\infty$ , impr  $\leftarrow$  TRUE // Initialization
  // Initial BLO, MPO
  ( tree, LnL )  $\leftarrow$  BLO (tree)
  ( tree, LnL )  $\leftarrow$  MPO (tree)
  // Easy and difficult datasets start with an NNI Round
  if difficulty < 0.3 OR difficulty > 0.7 then
    ( tree, LnL )  $\leftarrow$  NNI (tree)
    ( tree, LnL )  $\leftarrow$  MPO (tree)
    if CONVERGED(LnL) then go to SECOND STAGE
  end if
  end if

  // First stage, Fast-SPR + NNI
  sprRad  $\leftarrow$  5, step  $\leftarrow$  5, rf  $\leftarrow$   $\infty$ , maxRad  $\leftarrow$  25
  while NOT CONVERGED(LnL) AND rf != 0 AND impr do
    ( newTree, newLnL )  $\leftarrow$  FAST-SPR (tree, sprRad)
    ( newTree, newLnL )  $\leftarrow$  NNI (tree)
    impr  $\leftarrow$  ( newLnL - LnL >  $\epsilon$  ) // Boolean
    rf  $\leftarrow$  RFDIST ( tree, newTree)
    tree  $\leftarrow$  newTree, LnL  $\leftarrow$  newLnL
    if sprRad < maxRad then
      sprRad  $\leftarrow$  sprRad + step
    end if
  end while

SECOND STAGE: // SLOW-SPR + NNI
  ( tree, LnL )  $\leftarrow$  MPO (tree) // Intermediate MPO
  impr  $\leftarrow$  TRUE
  sprRad  $\leftarrow$  GETSLOWSPRRADIUS(difficulty)
  while impr do
    ( tree, newLnL )  $\leftarrow$  SLOW-SPR (tree, sprRad)
    ( tree, newLnL )  $\leftarrow$  NNI (tree)
    impr  $\leftarrow$  ( newLnL - LnL >  $\epsilon$  ), LnL  $\leftarrow$  newLnL
  end while
  ( tree, LnL )  $\leftarrow$  MPO (tree) // Final MPO
  return ( tree, LnL ) // Return statement
end function

function CONVERGED(LnL)
  if MLtree != NONE AND (MLnL - LnL) / |MLnL| < 0.01
  then
    return TRUE
  end if
  return FALSE
end function

function GETSLOWSPRRADIUS(difficulty)
  if difficulty < 0.5 then
    return [50 · difficulty + 5]
  else
    return [-50 · difficulty + 55]
  end if
end function

function GETRANDSTARTINGTREES(difficulty)
  numTrees  $\leftarrow$  [5 · NORMALDIST(difficulty, 0.5, 0.2)]
  return MIN(numTrees, 10) // MIN(): minimum function
end function

function GETPARSSTARTINGTREES(difficulty)
  numTrees  $\leftarrow$  [7 · NORMALDIST(difficulty, 0.5, 0.25)]
  return MIN(numTrees, 10) // MIN(): minimum function
end function

function NORMALDIST(x, m, s)
  inv_sqrt_2pi  $\leftarrow$  0.39894
  a  $\leftarrow$  (x - m) / s
  // EXP(): exponential function
  return inv_sqrt_2pi / (s · EXP(-0.5 · a · a))
end function

```

---

- |                                                                                                                                                                                                                                                                                                                                                                                                                                                                                                                                                                                                                               |                                                                                                                                                                                                                                                                                                                                                                                                                                                                                                                                                                                                                   |
|-------------------------------------------------------------------------------------------------------------------------------------------------------------------------------------------------------------------------------------------------------------------------------------------------------------------------------------------------------------------------------------------------------------------------------------------------------------------------------------------------------------------------------------------------------------------------------------------------------------------------------|-------------------------------------------------------------------------------------------------------------------------------------------------------------------------------------------------------------------------------------------------------------------------------------------------------------------------------------------------------------------------------------------------------------------------------------------------------------------------------------------------------------------------------------------------------------------------------------------------------------------|
| <p>1 • MPO(): Model parameter optimization</p> <p>2 routine, that takes as input a binary tree and</p> <p>3 optimizes its model parameters.</p> <p>4 • NNI(): NNI round routine, which takes as</p> <p>5 input a binary tree and applies a sequence of</p> <p>6 NNI moves, based on a greedy, hill-climbing</p> <p>7 heuristic. This function returns the NNI-</p> <p>8 optimal tree.</p> <p>9 • CONVERGED(): This function takes as input the</p> <p>10 current log-likelihood score of the best-scoring</p> <p>11 tree found so far during the tree search and</p> <p>12 returns TRUE if the current score is less than</p> | <p>13 1% worse than the reference score. This function</p> <p>14 will return FALSE otherwise. As a reference</p> <p>15 score, we use the log-likelihood score of the</p> <p>16 best ML tree found so far during all (preceding)</p> <p>17 finished tree searches.</p> <p>18 • FAST-SPR(): Fast version of the SPR round,</p> <p>19 which takes as input a binary tree, applies a</p> <p>20 sequence of SPR moves based on a hill-climbing</p> <p>21 heuristic, and returns the optimized tree.</p> <p>22 • SLOW-SPR(): Slow version of the SPR round,</p> <p>23 which takes as input a binary tree, applies a</p> |
|-------------------------------------------------------------------------------------------------------------------------------------------------------------------------------------------------------------------------------------------------------------------------------------------------------------------------------------------------------------------------------------------------------------------------------------------------------------------------------------------------------------------------------------------------------------------------------------------------------------------------------|-------------------------------------------------------------------------------------------------------------------------------------------------------------------------------------------------------------------------------------------------------------------------------------------------------------------------------------------------------------------------------------------------------------------------------------------------------------------------------------------------------------------------------------------------------------------------------------------------------------------|

1 sequence of SPR moves based on a hill-climbing  
 2 heuristic, and returns the optimized tree.  
 3 • `RFDIST()`: RF distance (Robinson and Foulds,  
 4 1981) function, which takes as input two binary  
 5 trees and returns the RF distance between  
 6 them.  
 7 • `GETSLOWSPRRADIUS()`: This function takes  
 8 as input the difficulty score of the MSA being  
 9 analyzed and returns the Slow-SPR radius  
 10 parameter calculated by adaptive RAxML-NG  
 11 (see Figure 2b, main text).

## 12 2. Difficulty score and Datasets

13 Figure 3 (available in the main text) shows the  
 14 distribution of empirical and simulated datasets  
 15 over 10 difficulty intervals. We can observe that  
 16 the proportion of datasets with a difficulty score  
 17 exceeding 0.9 is somewhat low compared to the  
 18 rest of the datasets. In the main text, we briefly  
 19 mention that this phenomenon is associated  
 20 with the definition of the difficulty score *per*  
 21 *se*. Further, in Section 2.2 in the main text,  
 22 we provide a short description of the difficulty  
 23 prediction paper (Haag *et al.*, 2022b). In this  
 24 study members of our lab initially defined and  
 25 calculated the difficulty score of empirical MSAs  
 26 by conducting 100 ML tree searches on each  
 27 dataset using RAxML-NG. They provided the  
 28 following definition of the difficulty score:

$$\text{difficulty} = \frac{1}{5} \cdot (RF_{all} + RF_{pl} + \frac{N_{all}^*}{N_{all}} + \frac{N_{pl}^*}{N_{pl}} + (1 - \frac{N_{pl}}{N_{all}})) \quad (1)$$

29 The five terms included within the parentheses  
 30 in Eq. S1 are the following in order of appearance:

- 31 •  $RF_{all}$ : The average relative RF distance  
 32 between all pairs of trees in the 100 output ML  
 33 trees.
- 34 •  $RF_{pl}$ : The average relative RF distance between  
 35 all pairs of trees in the plausible tree set.
- 36 •  $\frac{N_{all}^*}{N_{all}}$ : The number of unique tree topologies in  
 37 the output ML tree set ( $N_{all}^*$ ) divided by the  
 38 total number of trees in the same set (e.g.,  
 39 given that Haag *et al.* carried out 100 ML tree  
 40 searches, this parameter would be  $N_{all} = 100$ ).
- 41 •  $\frac{N_{pl}^*}{N_{pl}}$ : The number of unique tree topologies in  
 42 the plausible tree set ( $N_{pl}^*$ ) divided by the total  
 43 number trees in the same set ( $N_{pl}$ ).
- 44 •  $\frac{N_{pl}}{N_{all}}$ : The number of trees in the plausible tree  
 45 set ( $N_{pl}$ ) divided by the total number of trees  
 46 in the output ML tree set ( $N_{all} = 100$ ). We  
 47 subtract this ratio from 1, leading to the full  
 48 expression of the last term ( $1 - \frac{N_{pl}}{N_{all}}$ )

49 Each term results in a value between 0.0 and  
 50 1.0. Since all terms are divided by 5, each of  
 51 them can individually contribute up to 0.2 units  
 52 to the overall difficulty score. The reason why  
 53 only a small proportion of MSAs have a difficulty  
 54 score exceeding 0.9 is mainly associated with the  
 55 last term in the parentheses ( $1 - \frac{N_{pl}}{N_{all}}$ ). On easy  
 56 datasets, almost all independent ML tree searches  
 57 yield trees with similar topologies and likelihood  
 58 scores. Therefore, the vast majority of the final  
 59 ML trees is included in the plausible tree set.

1 In this case, the ratio  $\frac{N_{pl}}{N_{all}}$  is close to 1 and 33 MSAs are distributed more uniformly within the  
2 the term  $(1 - \frac{N_{pl}}{N_{all}})$  is close to 0. However, the 34 respective difficulty score range [0.7,1].  
3 majority of ML trees inferred on difficult MSAs 35 Regarding the datasets used in our experiments,  
4 are also plausible. While the topologies are highly 36 in Section 4 of the main text we describe in detail  
5 incongruent, their likelihood scores are almost 37 the filtering process we followed to generate 9,515  
6 equal, and therefore the term  $(1 - \frac{N_{pl}}{N_{all}})$  is, again, 38 empirical and 5,000 simulated MSAs in total.  
7 close to 0. Hence, on difficult MSAs the last 39 Out of the 9,515 empirical MSAs, 8,052 are  
8 term contributes less than 0.1 units (out of 0.2), 40 unpartitioned alignments with DNA sequences  
9 yielding an upper "bound" of 0.9 for the overall 41 (UP-DNA), 638 are partitioned alignments with  
10 score which is rarely exceeded. The four remaining 42 DNA sequences (P-DNA), 817 are unpartitioned  
11 terms, however, contribute 0.2 units each, and 43 alignments with amino-acid sequences (UP-AA),  
12 thus, the problem is somewhat alleviated for 44 and 8 are partitioned alignments with amino-acid  
13 difficult MSAs. This happens because, in such 45 sequences (P-AA). Further, from the 5,000  
14 cases, both the RF distance terms and the unique- 46 simulated MSAs, 4,482 are UP-DNA, 18 are P-  
15 topology ratios are close to 1, implying a high 47 DNA, 487 are UP-AA, and 13 are P-AA datasets.  
16 number of distinct and incongruent topologies in 48 We subsampled the simulated DNA datasets from  
17 the final ML tree set. 49 the datasets used in study by Höhler *et al.* (2022).

18 Overall, the difficulty score for "hopeless-to- 50 We simulated the AA MSAs based on a sample  
19 analyze" MSAs is usually underestimated by 51 of RAxML Grove (Höhler *et al.*, 2021) datasets.  
20 the current definition (Eq. S1). Intuitively, the 52 RAxML Grove datasets contain files with inferred  
21 difficulty score of such datasets should be close 53 trees, their respective estimated substitution  
22 to 1.0, but since the contribution of the last term 54 model parameters, and statistical information  
23 in the parenthesis is low (for the reasons outlined 55 about the analyzed MSA. In order to avoid  
24 above), the calculated value usually lies within the 56 simulating very large MSAs for the consecutive  
25 range of [0.8,0.9]. Indeed, only a small proportion 57 analyses, we selected datasets with an MSA  
26 of empirical MSAs in TreeBASE (Piel *et al.*, 58 number of unique sites (i.e., number of patterns)  
27 2009) exhibit a difficulty score exceeding 0.9. On 59 and number of taxa below the 95th percentile  
28 the other hand, due to the high contribution of 60 respectively. Then, we used the trees and the  
29 the remaining four terms, the difficulty scores of 61 substitution models that were selected by the  
30 "hopeless-to-analyze" datasets are rarely below 62 users of the RAxML web servers to estimate the  
31 0.8. We believe that the definition of the difficulty 63 model parameters we used to simulate MSAs with  
32 score should be reformulated such that difficult 64 AliSim (Ly-Trong *et al.*, 2022). Overall, we used

1 the following substitution models for AA MSA  
 2 simulations: JTT+ $\Gamma$  (Jones *et al.*, 1992)(29.79%),  
 3 LG+ $\Gamma$  (Le and Gascuel, 2008)(28.64%),  
 4 Dayhoff+ $\Gamma$  (Dayhoff, 1972)(26.70%),  
 5 WAG+ $\Gamma$  (Whelan and Goldman, 2001)(7.37%),  
 6 Blosum62+ $\Gamma$  (Henikoff and Henikoff, 1992)(4%),  
 7 MtArt+ $\Gamma$  (Abascal *et al.*, 2007)(2.71%),  
 8 VT+ $\Gamma$  (Müller and Vingron, 2000)(2.34%),  
 9 GTR+ $\Gamma$ (1.57%), MtREV+ $\Gamma$  (Adachi and  
 10 Hasegawa, 1996)(1.22%), MtMAM+ $\Gamma$  (Yang  
 11 *et al.*, 1998)(1.0%), rtREV+ $\Gamma$  (Dimmic *et al.*,  
 12 2002)(0.85%), MtZOA+ $\Gamma$  (Rota-Stabelli  
 13 *et al.*, 2009)(0.65%), cpREV+ $\Gamma$  (Adachi  
 14 *et al.*, 2000)(0.47%), PMB+ $\Gamma$  (Veerassamy  
 15 *et al.*, 2003)(0.22%), HIVw+ $\Gamma$  (Nickle *et al.*,  
 16 2007)(0.1%), FLU+ $\Gamma$  (Dang *et al.*, 2010)(0.07%),  
 17 DCMut+ $\Gamma$  (Kosiol and Goldman, 2005)(0.07%),  
 18 HIVb+ $\Gamma$  (Nickle *et al.*, 2007)(0.07%).

19 For the analyses of all DNA MSAs, we used  
 20 the GTR+ $\Gamma$  (Tavaré, 1986) model. In order to  
 21 reduce the computational complexity and the CO<sub>2</sub>  
 22 footprint when analyzing protein sequences, we  
 23 used the LG model for the analysis of AA MSAs  
 24 and did not account for rate heterogeneity with  
 25 the  $\Gamma$  model (i.e., LG+ $\Gamma$ ).

### 26 3. Commands

27 Users can invoke the adaptive RAxML-NG version  
 28 using the `--adaptive` option when running the  
 29 standard version of RAxML-NG. Our results  
 30 can be reproduced by executing the following  
 31 commands:

#### 32 Standard version:

```

33 ./raxml-ng --threads 1 --msa {msa}
34 --model {model} --seed 0
35 --extra compat-v11
  
```

#### 36 Adaptive version:

```

37 ./raxml-ng --adaptive --threads 1
38 --msa {msa} --model {model} --seed 0
39 --lh-epsilon 0.1 --lh-epsilon-triplet 0.1
  
```

40 We wish to emphasize that the adaptive version  
 41 of RAxML-NG was designed and implemented  
 42 based on RAxML-NG v1.1. Since then, a  
 43 new version of RAxML-NG (i.e., v1.2) has  
 44 been released. RAxML-NG v1.2 introduces  
 45 modifications in the default values of log-  
 46 likelihood improvement thresholds, for example  
 47 the numerical convergence parameter  $\epsilon$  discussed  
 48 in Section S1 or the convergence threshold  
 49 when optimizing the branch-lengths of the three  
 50 adjacent branches around the insertion point  
 51 during a Slow SPR move (see Section 2.1 in the  
 52 main text)<sup>1</sup>. These changes in the default values  
 53 have been incorporated into the adaptive version  
 54 as well.

55 In our experiments we compared RAxML-  
 56 NG v1.1 with adaptive RAxML-NG always  
 57 using the default values from RAxML-NG v1.1  
 58 for the convergence parameters. RAxML-  
 59 NG v1.1 can be invoked by adding the  
 60 `--extra compat-v11` argument to the standard

<sup>1</sup>More information regarding RAxML-NG v1.2 can be found at:  
<https://github.com/amkozlov/raxml-ng/releases/tag/1.2.0>

1 RAxML-NG command line. Similarly, the  
 2 adaptive version that uses the default values  
 3 from RAxML-NG v1.1 for the convergence  
 4 parameters can be invoked by adding the  
 5 `--lh-epsilon 0.1 --lh-epsilon-triplet 0.1`  
 6 arguments to the adaptive RAxML-NG command  
 7 line. In case these arguments are omitted, the user  
 8 will invoke standard/adaptive RAxML-NG with  
 9 the updated default values for the convergence  
 10 parameters.

#### 11 4. IQ-TREE 2 significance tests

12 IQ-TREE 2 (Minh *et al.*, 2020) supports several  
 13 statistical tests (Naser-Khdour *et al.*, 2019) using  
 14 the RELL approximation (Kishino *et al.*, 1990)  
 15 to determine if some trees in an input tree  
 16 set are statistically significantly better than  
 17 the remaining trees. We use these statistical  
 18 tests to assess the ML trees inferred by the  
 19 standard and adaptive versions of RAxML-  
 20 NG. The implemented tests are: the bootstrap  
 21 proportion<sup>2</sup>, the Kishino-Hasegawa test (Kishino  
 22 and Hasegawa, 1989) and the Shimodaira-  
 23 Hasegawa test (Shimodaira and Hasegawa, 1999),  
 24 both in their weighted and un-weighted variants,  
 25 the Approximately Unbiased test (Shimodaira,  
 26 2002), as well as the Expected Likelihood Weight  
 27 test (Strimmer and Rambaut, 2002). We use the  
 28 default IQ-TREE settings regarding the number  
 29 of resampled estimated log-likelihood (RELL)

<sup>2</sup>This method is also described in Kishino *et al.* (1990).

30 replicates (10,000) as well as for the significance  
 31 level ( $\alpha=0.05$ ).

#### 32 5. Absolute log-likelihood differences

33 Figures S1 and S2 summarize the absolute log-  
 34 likelihood differences ( $LD$ ) for all standard-  
 35 adaptive tree pairs, measured in log-likelihood  
 36 units ( $LHU$ ). We divide datasets into ten  
 37 difficulty intervals. The heights of the bars  
 38 correspond to the proportion of datasets, within  
 39 the specified difficulty interval, where the LH  
 40 difference lies within a specified LHU range. For  
 41 example, in Figure S1 and on difficulty interval  
 42  $[0,0.1)$ , there are 1,196 datasets (purple bar)  
 43 where the absolute LH difference of the standard-  
 44 adaptive pair is between 0 and 2 LHU. This  
 45 range corresponds to approximately 72% of the  
 46 empirical datasets that have a difficulty score  
 47 within  $[0,0.1)$ .

#### 48 ACKNOWLEDGMENT

49 This study was financially supported by  
 50 the Klaus Tschira Foundation and by the  
 51 European Union (EU) under Grant Agreement No  
 52 101087081 (Comp-Biodiv-GR).

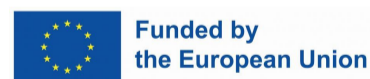

#### 53 References

- 54 Abascal, F., Posada, D., and Zardoya, R. 2007. Mtart: a  
 55 new model of amino acid replacement for arthropoda.  
 56 *Molecular biology and evolution*, 24(1): 1–5.

- 1 Adachi, J. and Hasegawa, M. 1996. Model of amino acid 40  
2 substitution in proteins encoded by mitochondrial dna. 41  
3 *Journal of molecular evolution*, 42: 459–468. 42
- 4 Adachi, J., Waddell, P. J., Martin, W., and Hasegawa, M. 43  
5 2000. Plastid genome phylogeny and a model of amino 44  
6 acid substitution for proteins encoded by chloroplast 45  
7 dna. *Journal of molecular evolution*, 50: 348–358. 46
- 8 Dang, C. C., Le, Q. S., Gascuel, O., and Le, V. S. 2010. Flu, 47  
9 an amino acid substitution model for influenza proteins. 48  
10 *BMC evolutionary biology*, 10(1): 1–11. 49
- 11 Dayhoff, M. O. 1972. A model of evolutionary change in 50  
12 proteins. *Atlas of protein sequence and structure*, 5: 89– 51  
13 99. 52
- 14 Dimmic, M. W., Rest, J. S., Mindell, D. P., and Goldstein, 53  
15 R. A. 2002. rtrv: an amino acid substitution matrix 54  
16 for inference of retrovirus and reverse transcriptase 55  
17 phylogeny. *Journal of molecular evolution*, 55(1): 65. 56
- 18 Haag, J., Hübner, L., Kozlov, A. M., and Stamatakis, A. 57  
19 2022a. The free lunch is not over yet – systematic 58  
20 exploration of numerical thresholds in phylogenetic 59  
21 inference. *bioRxiv*. 60
- 22 Haag, J., Höhler, D., Bettisworth, B., and Stamatakis, 61  
23 A. 2022b. From Easy to Hopeless—Predicting the 62  
24 Difficulty of Phylogenetic Analyses. *Molecular Biology* 63  
25 *and Evolution*, 39(12). msac254. 64
- 26 Henikoff, S. and Henikoff, J. G. 1992. Amino acid 65  
27 substitution matrices from protein blocks. *Proceedings* 66  
28 *of the National Academy of Sciences*, 89(22): 10915– 67  
29 10919. 68
- 30 Höhler, D., Haag, J., Kozlov, A. M., and Stamatakis, 69  
31 A. 2022. A representative performance assessment of 70  
32 maximum likelihood based phylogenetic inference tools. 71  
33 *bioRxiv*. 72
- 34 Höhler, D., Pfeiffer, W., Ioannidis, V., Stockinger, H., and 73  
35 Stamatakis, A. 2021. RAxML Grove: an empirical 74  
36 phylogenetic tree database. *Bioinformatics*, 38(6): 75  
37 1741–1742. 76
- 38 Jones, D. T., Taylor, W. R., and Thornton, J. M. 1992. The 77  
39 rapid generation of mutation data matrices from protein 78  
40 sequences. *Bioinformatics*, 8(3): 275–282.
- 41 Kishino, H. and Hasegawa, M. 1989. Evaluation of the  
42 maximum likelihood estimate of the evolutionary tree  
43 topologies from dna sequence data, and the branching  
44 order in hominoidea. *Journal of molecular evolution*,  
45 29: 170–179.
- 46 Kishino, H., Miyata, T., and Hasegawa, M. 1990. Maximum  
47 likelihood inference of protein phylogeny and the origin  
48 of chloroplasts. *Journal of Molecular Evolution*, 31: 151–  
49 160.
- 50 Kosiol, C. and Goldman, N. 2005. Different versions of the  
51 dayhoff rate matrix. *Molecular biology and evolution*,  
52 22(2): 193–199.
- 53 Kozlov, A. M., Darriba, D., Flouri, T., Morel, B., and  
54 Stamatakis, A. 2019. RAxML-NG: a fast, scalable and  
55 user-friendly tool for maximum likelihood phylogenetic  
56 inference. *Bioinformatics*, 35(21): 4453–4455.
- 57 Le, S. Q. and Gascuel, O. 2008. An improved general  
58 amino acid replacement matrix. *Molecular biology and*  
59 *evolution*, 25(7): 1307–1320.
- 60 Ly-Trong, N., Naser-Khdour, S., Lanfear, R., and Minh,  
61 B. Q. 2022. AliSim: A Fast and Versatile Phylogenetic  
62 Sequence Simulator for the Genomic Era. *Molecular*  
63 *Biology and Evolution*, 39(5). msac092.
- 64 Minh, B. Q., Schmidt, H. A., Chernomor, O., Schrepf,  
65 D., Woodhams, M. D., von Haeseler, A., and Lanfear,  
66 R. 2020. IQ-TREE 2: New Models and Efficient  
67 Methods for Phylogenetic Inference in the Genomic Era.  
68 *Molecular Biology and Evolution*, 37(5): 1530–1534.
- 69 Müller, T. and Vingron, M. 2000. Modeling amino acid  
70 replacement. *Journal of Computational Biology*, 7(6):  
71 761–776.
- 72 Naser-Khdour, S., Minh, B. Q., Zhang, W., Stone, E. A.,  
73 and Lanfear, R. 2019. The Prevalence and Impact of  
74 Model Violations in Phylogenetic Analysis. *Genome*  
75 *Biology and Evolution*, 11(12): 3341–3352.
- 76 Nickle, D. C., Heath, L., Jensen, M. A., Gilbert, P. B.,  
77 Mullins, J. I., and Kosakovsky Pond, S. L. 2007. Hiv-  
78 specific probabilistic models of protein evolution. *PLoS*

- 1     *one*, 2(6): e503. 40     *evolution*, 15(12): 1600–1611.
- 2 Piel, W. H., Chan, L., Dominus, M. J., Ruan, J., Vos, R. A.,  
3     and Tannen, V. 2009. TreeBASE v. 2: A Database of  
4     Phylogenetic Knowledge. *e-BioSphere* 2009.
- 5 Robinson, D. and Foulds, L. 1981. Comparison of  
6     phylogenetic trees. *Mathematical Biosciences*, 53(1):  
7     131–147.
- 8 Rota-Stabelli, O., Yang, Z., and Telford, M. J. 2009. Mtzoa:  
9     a general mitochondrial amino acid substitutions model  
10     for animal evolutionary studies. *Molecular phylogenetics*  
11     *and evolution*, 52(1): 268–272.
- 12 Shimodaira, H. 2002. An approximately unbiased test of  
13     phylogenetic tree selection. *Systematic biology*, 51(3):  
14     492–508.
- 15 Shimodaira, H. and Hasegawa, M. 1999. Multiple  
16     comparisons of log-likelihoods with applications to  
17     phylogenetic inference. *Molecular biology and evolution*,  
18     16(8): 1114.
- 19 Stamatakis, A. 2014. RAxML version 8: a tool  
20     for phylogenetic analysis and post-analysis of large  
21     phylogenies. *Bioinformatics*, 30(9): 1312–1313.
- 22 Strimmer, K. and Rambaut, A. 2002. Inferring confidence  
23     sets of possibly misspecified gene trees. *Proceedings*  
24     *of the Royal Society of London. Series B: Biological*  
25     *Sciences*, 269(1487): 137–142.
- 26 Tavaré, S. 1986. Some probabilistic and statistical problems  
27     in the analysis of dna sequences. *Lect Math Life Sci (Am*  
28     *Math Soc)*, 17: 57–86.
- 29 Veerassamy, S., Smith, A., and Tillier, E. R. 2003.  
30     A transition probability model for amino acid  
31     substitutions from blocks. *Journal of Computational*  
32     *Biology*, 10(6): 997–1010.
- 33 Whelan, S. and Goldman, N. 2001. A general empirical  
34     model of protein evolution derived from multiple  
35     protein families using a maximum-likelihood approach.  
36     *Molecular biology and evolution*, 18(5): 691–699.
- 37 Yang, Z., Nielsen, R., and Hasegawa, M. 1998. Models  
38     of amino acid substitution and applications to  
39     mitochondrial protein evolution. *Molecular biology and*



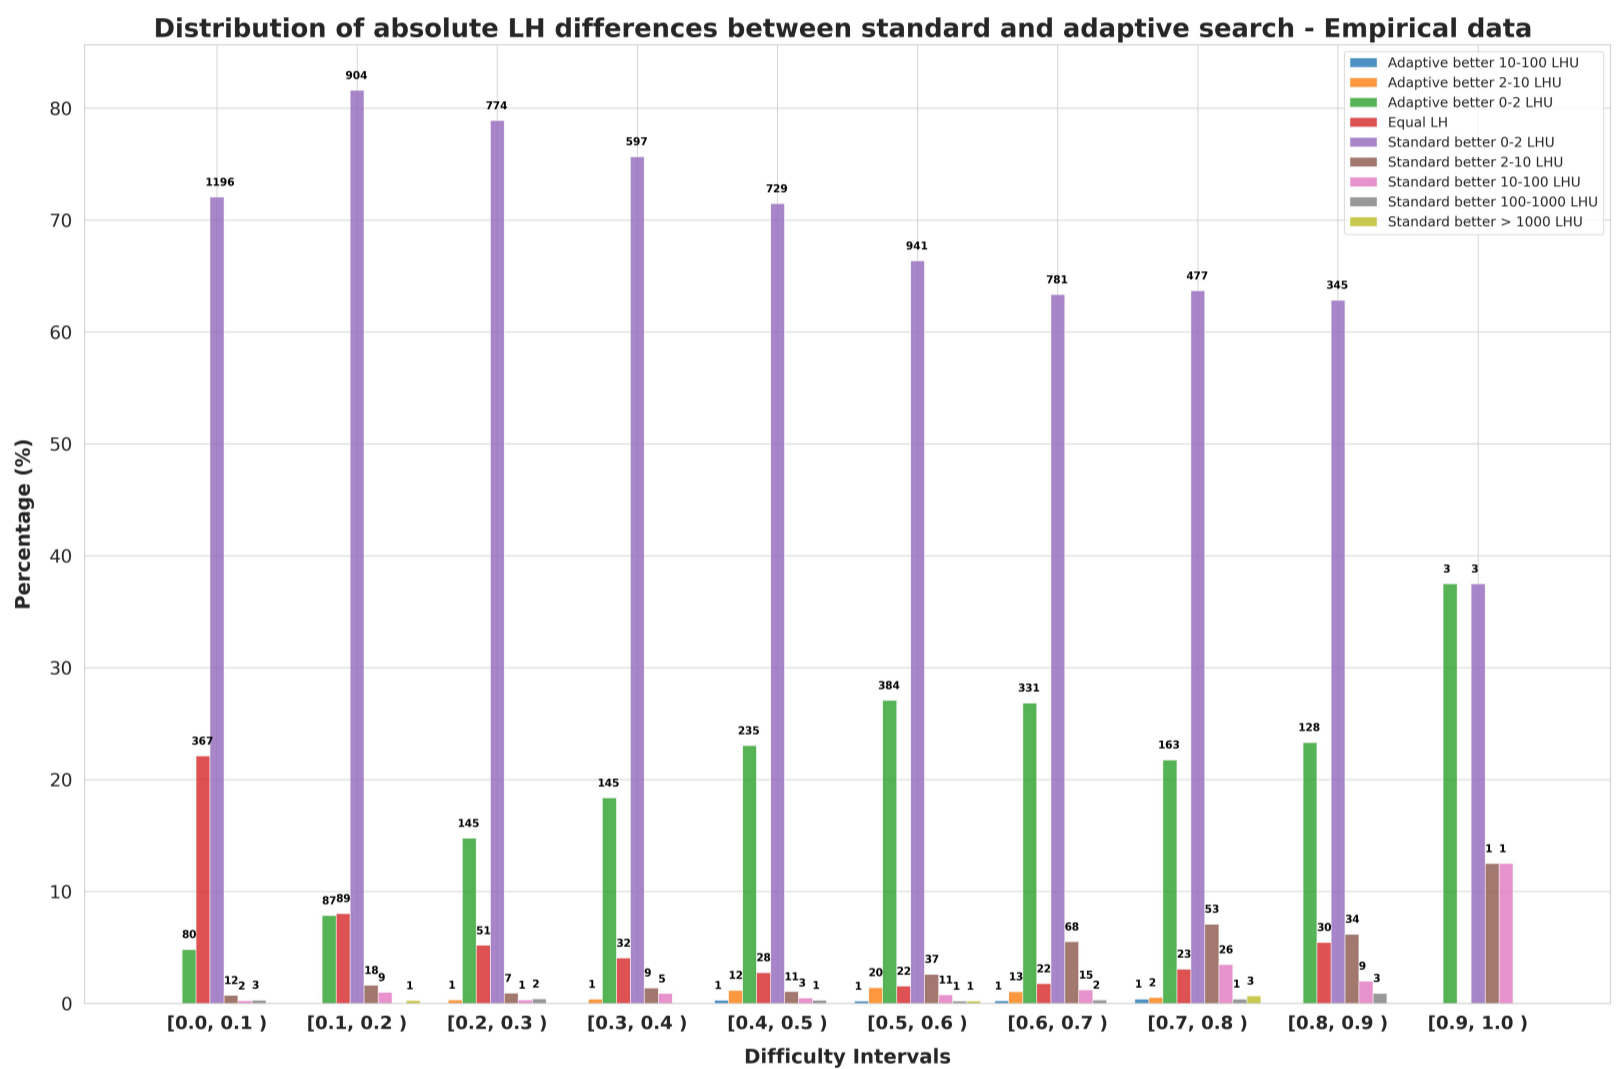

**FIG. 1.** Distributions of absolute log-likelihood differences in all standard-adaptive tree pairs, on empirical data. The absolute LH differences are measured in log-likelihood units (*LHU*). We divide the MSAs into ten difficulty intervals. The height of the bars corresponds to the proportion of datasets, within the specified difficulty interval, in which the score of standard and adaptive trees have an absolute difference within a range of *LHU*. The numbers at the top of the bars correspond to the number of datasets in this *LHU* range.

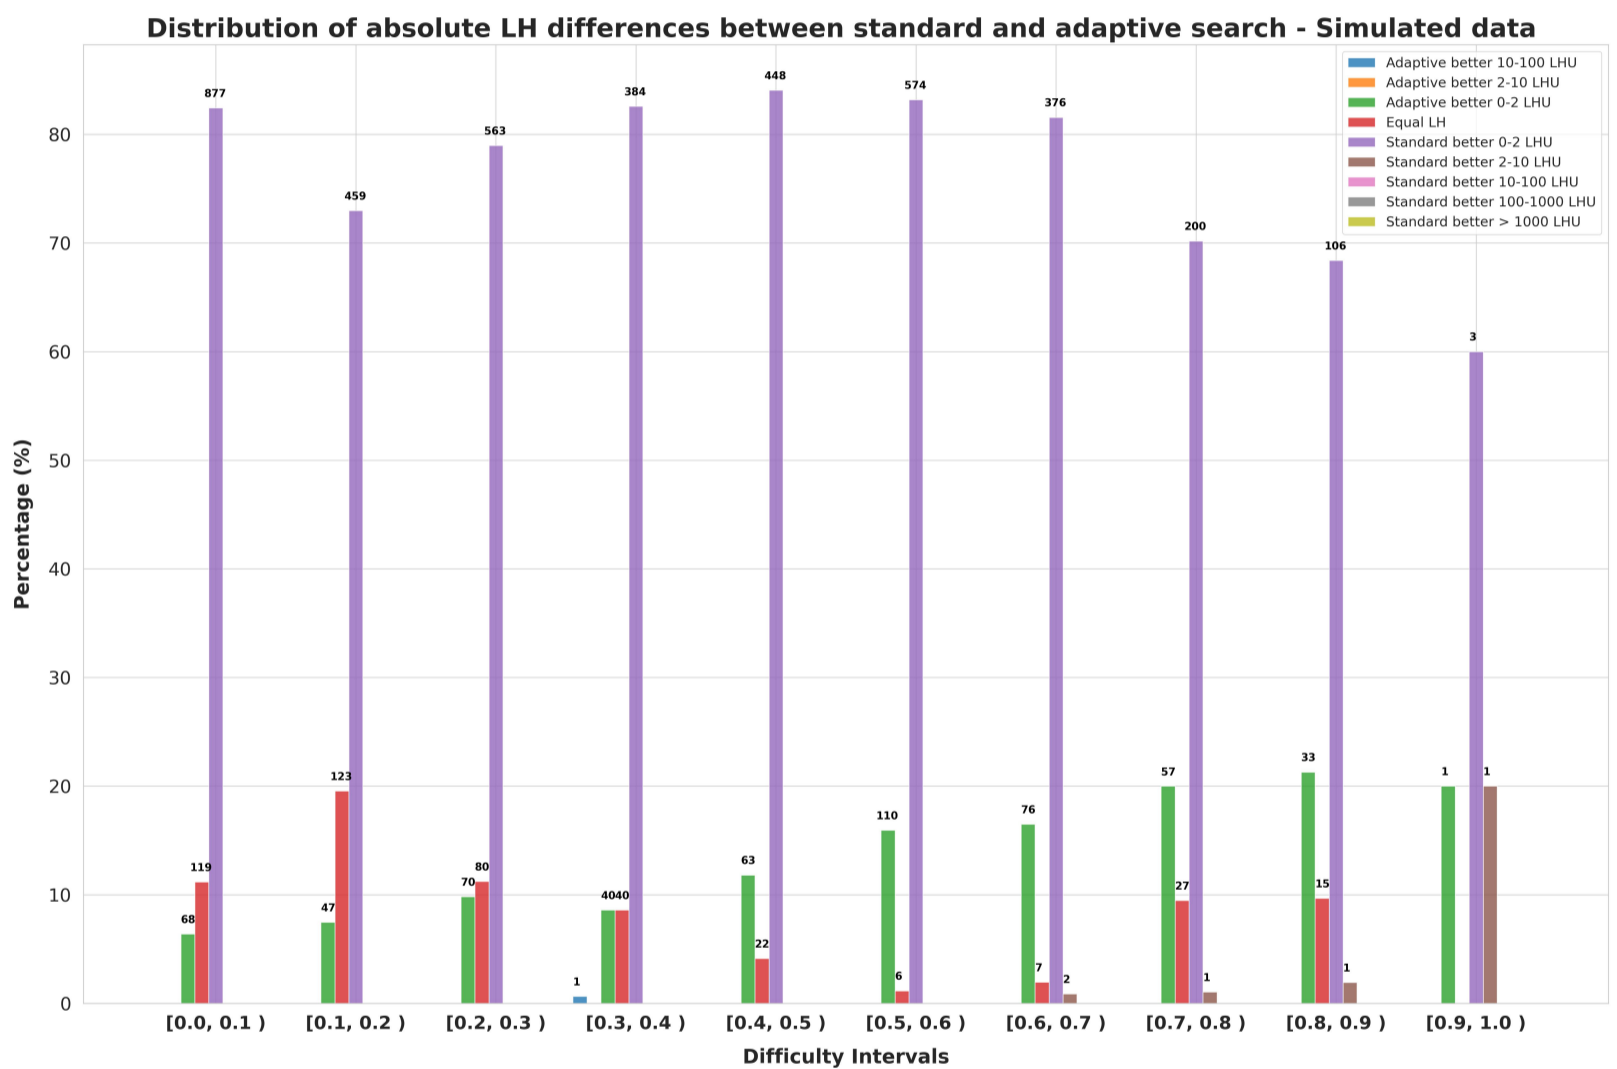

**FIG. 2.** Distributions of absolute log-likelihood differences in all standard-adaptive tree pairs, on simulated data. The absolute LH differences are measured in log-likelihood units (*LHU*). We divide the MSAs into ten difficulty intervals. The height of the bars corresponds to the proportion of datasets, within the specified difficulty interval, in which the score of standard and adaptive trees have an absolute difference within a range of *LHU*. The numbers at the top of the bars correspond to the number of datasets in this *LHU* range.
